# Supplementary material
Source: PubMed Central journal article supplement (PMC4326977)

## Supplementary Methods

### **Imagestream® analysis**

CD8<sup>+</sup> T cells were negatively enriched from PBMCs using EasySep™ CD8<sup>+</sup> T cell separation kit (StemCell Technologies) and stained with anti-CD161 APC together with anti-CD107α FITC, anti-Granzyme A PerCP-Cy5.5 or anti-Granzyme K FITC. Cells were fixed before analysis by flow cytometry and image capture with Imagestream® imaging cytometer (Amnis Corporation). 15,000 events were collected on the Imagestream® for co-localisation analysis. Post-acquisition spectral compensation and statistical co-localisation analysis was performed using IDEAS® image analysis software package (Amnis Corporation).

Co-localisation was quantified using a 'Bright Detail Similarity Score', defined as a log-transformed Pearson's correlation coefficient of the intensities of the spatially correlated pixels within the whole cell, as a measure of the degree to which two images were linearly correlated. A score of >2.0 was considered co-localised.

### ***In vitro* stimulation (continued)**

For profiling of granule contents after direct cytokine stimulation of CD8<sup>+</sup> T cells, CD8<sup>+</sup> T cells isolated using CD8 Microbeads (Miltenyi Biotec) were stimulated for 16 hours with the following cytokines/mitogens: recombinant human IL-2 (Roche), IL-12, IL-18, IL-15, IL-23, TGFβ, IL-1β (all Miltenyi Biotec), IL-21, IL-7 (both PeproTech Inc) all at 50ng/ml; PMA (50ng/ml) and ionomycin (250ng/ml) (Sigma-Aldrich); anti-CD3/CD28/CD2-coated beads (Miltenyi Biotec). For time-course PBMC stimulations, *E. coli* was added at 10BpC or anti-CD3/CD28/CD2-coated

beads at a 1:1 ratio. To assay IFN $\gamma$  production, THP1s were cultured with *E. coli* overnight as described previously<sup>13</sup> at 25 BpC, washed, and then PBMCs were added for 5 hours, with Brefeldin A (eBioscience; 3 $\mu$ g/ml) added after 1 hour of stimulation.

## Supplementary Figure legends

**Figure S1. GrA and GrK expression in cord blood CD8<sup>+</sup> T cells, and simultaneous analysis of cytotoxic-granule composition of adult peripheral blood MAIT cells.** A) Frequency of GrA and GrK expressing cells in cord blood CD8<sup>+</sup> T cells according to CD161 expression levels. Representative plot and cumulative data for 6 donors is shown. Results shown as mean  $\pm$  S.E.M, analyzed by repeated measures one way ANOVA, with Bonferroni's multiple comparisons test. B) Frequency of perforin expressing cells in adult peripheral blood CD8<sup>+</sup> T cells from healthy donors according to CD161 expression levels. Cumulative data for 12 healthy individuals is shown. Results shown as mean  $\pm$  S.E.M, analyzed by repeated measures one way ANOVA, with Bonferroni's multiple comparisons test. \*P<0.05, \*\*\*\*P<0.0001. C) Simultaneous analysis of cytotoxic-granule composition of V $\alpha$ 7.2<sup>+</sup>CD161<sup>++</sup>CD8<sup>+</sup> T cells (MAIT cells) in *ex vivo* adult peripheral blood, on the basis of GrA, GrB, GrK, and perforin expression. All the possible combinations of the different markers are shown on the x-axis of the graph, and the percentage of MAIT cells expressing each of these combinations are shown on the y-axis. Each dot represents a healthy donor (n=8). Data is summarized in the pie chart, with each slice corresponding to the average proportion of MAIT cells positive for the combinations of markers shown on the graph.

**Figure S2. Changes in cytotoxic granule content of MAIT cells with cytokine- and TCR-stimulation.** Enriched CD8<sup>+</sup> T cells were stimulated for 24 hours with the indicated cytokines, anti-CD3 or anti-CD3/CD28/CD2 coated beads, or PMA/ionomycin, and analyzed for expression of A) GrB (n=8) B) Perforin (n=8) C) GrK (n=10) D) GrA (n=10) in MAIT cells. Cumulative data (left) and representative staining for each marker from the same donor (right) is shown for GrB and perforin, and histograms for the indicated stimuli are shown for GrA and GrK. Results analyzed by repeated measures one-way ANOVA with Bonferroni's multiple comparisons test. E, F) Expression of E) granulysin (n=8) and F) intracellular FasL (n=5) in CD8<sup>+</sup> T cells after stimulation of PBMCs with *E. coli* or anti-CD3/CD28/CD2 beads for 24 hours. NK cells were used as a positive control for staining. Representative staining (left) and cumulative data (right) is shown. Bars indicate mean  $\pm$  S.E.M. \*P<0.05, \*\*P<0.01, \*\*\*P<0.001.

**Figure S3. Changes in the expression of GrB, CD69, CD161 and Va7.2 in MAIT cells with increasing concentration of *E. coli*.** Enriched CD8<sup>+</sup> T cells were stimulated overnight with THP1 cells pre-exposed to *E. coli* at the indicated BpCs or PMA/ionomycin. A) Representative plots showing GrB (top), CD69 (middle), and Va7.2 (bottom) expression against CD161 from the same donor. In the bottom panel, the highly activated CD69<sup>high</sup> cells are overlaid in blue, and the numbers represent the percentages of the indicated populations within the CD8<sup>+</sup> T cells. B) Cumulative data showing percentage of GrB<sup>+</sup> cells (left) and gMFI of CD69 (right) within CD161<sup>++</sup>CD8<sup>+</sup> T cells. C) Frequency of CD161<sup>++</sup>CD8<sup>+</sup> T cells within CD8<sup>+</sup> T cells. D) Frequency of the indicated populations within CD8<sup>+</sup> T cells. For all data, mean  $\pm$  S.E.M are shown (n=5).

**Figure S4. *E. coli*-stimulated MAIT cells have a higher cytotoxic capacity compared to *ex vivo* MAIT cells.** A) Flow cytometry gating strategy used to analyze specific killing of target cells mediated by MAIT cells. BCL and T cell gates were based on wells with only BCLs or T cells. B) Frequency of CD161<sup>++</sup>CD8<sup>+</sup> T cells within the CD8<sup>+</sup> T cells, in the same donors either *ex vivo* or stimulated with *E. coli* for 6 days. C) Percentage specific killing plotted against E:T adjusted for actual ratio of CD161<sup>++</sup>CD8<sup>+</sup> T cells to CFSE<sup>+</sup> target cells in each well calculated from the expected ratio (See Materials and Methods). D) Trogocytosis of CFSE and CTV from the CFSE<sup>+</sup> *E. coli*-exposed BCL or CTV<sup>+</sup> negative control BCL membranes onto CD161<sup>++</sup>CD8<sup>+</sup> T cells. CFSE<sup>+</sup> *E. coli*-exposed BCL = Target cells, CTV<sup>+</sup> negative control BCL = Neg cells.

**Figure S5. CD161<sup>++</sup>CD8<sup>+</sup> T cells, including the MAIT cells, proliferate in response to cytokines and TCR-stimulation.** A) THP1 cells pre-exposed to *E. coli* and irradiated were used to stimulate enriched CTV-labeled CD8<sup>+</sup> T cells for 6 days, with or without anti-MR1 blocking antibody. Histogram gated on V $\alpha$ 7.2<sup>+</sup> CD161<sup>++</sup>CD8<sup>+</sup> T cells. B) Downregulation of CD161 in MAIT cells with increasing rounds of cell division, both in enriched CD8<sup>+</sup> T cells (top) and PBMCs (bottom) in response to *E. coli*. Graph shows fold change in gMFI of CD161 in proliferating CD161<sup>++</sup>V $\alpha$ 7.2<sup>+</sup>CD8<sup>+</sup> T cells compared to non-dividing CD161<sup>++</sup>V $\alpha$ 7.2<sup>+</sup>CD8<sup>+</sup> T cells in the same well. C) CTV-labeled PBMCs were stimulated with PFA-fixed *E. coli* for 6 days and stained for CD8 $\beta$ . CD8 $\beta$  gating based on isotype control. Proliferation of CD8 $\alpha\beta$  and CD8 $\alpha\alpha$  MAIT cells in representative donor shown in histogram. D-G) PBMCs from healthy donors were CTV-labeled and cultured for 6 days with the indicated stimuli. D) Representative staining of CD8<sup>+</sup> T cells showing dilution of

CTV and E) CD69 expression in response to cytokines, according to CD161 expression levels. F) Frequency of CD161<sup>++</sup> and CD161<sup>+</sup>CD8<sup>+</sup> T cells diluting CTV after stimulation with the indicated stimuli (n=5-11). CD161<sup>-</sup>CD8<sup>+</sup> T cells were not included in the analysis as they include naïve T cells. Frequency of CTV<sup>low</sup> cells in unstimulated cells was subtracted for each donor. G) Frequency of CD161<sup>++</sup> and CD161<sup>+</sup> CD8<sup>+</sup> T cells expressing CD69 after 6 days of culture with the indicated stimuli (n=5-11). Frequency of CD69 expression in unstimulated cells was subtracted for each donor. Significance is indicated for differences between CD161<sup>++</sup> and CD161<sup>+</sup>CD8<sup>+</sup> T cells analyzed by a two-way ANOVA with Bonferroni's multiple comparisons test.

**Figure S6. Activation of CD8<sup>-</sup>CD161<sup>++</sup>/MAIT cells by *E. coli*. A, B)**

Degranulation of CD8<sup>-</sup> T cells in the killing assays. Representative plots showing gating of *ex vivo* (A; upper panel) and *E. coli*-stimulated (lower panel) CD8<sup>-</sup> T cells in the killing assays, and their CD107 $\alpha$  expression in wells with or without *E. coli*-exposed target cells. B) Cumulative data showing increase in %CD107 $\alpha$ <sup>+</sup> cells in indicated CD8<sup>-</sup> T cell populations compared to wells with T cells only. Two-way ANOVA, with Bonferroni's multiple comparisons test (n=8). C, D) 5hr stimulation of PBMCs with *E. coli*-exposed THP1 cells, looking at IFN $\gamma$  production from CD8<sup>+</sup>, CD4<sup>+</sup>, and double-negative (DN; CD8<sup>-</sup>CD4<sup>-</sup>) MAIT cells. Gating strategy (C) and representative plots showing IFN $\gamma$  production from different MAIT cell subsets (D). One-way ANOVA, with Bonferroni's multiple comparisons test (n=9).

Figure S1

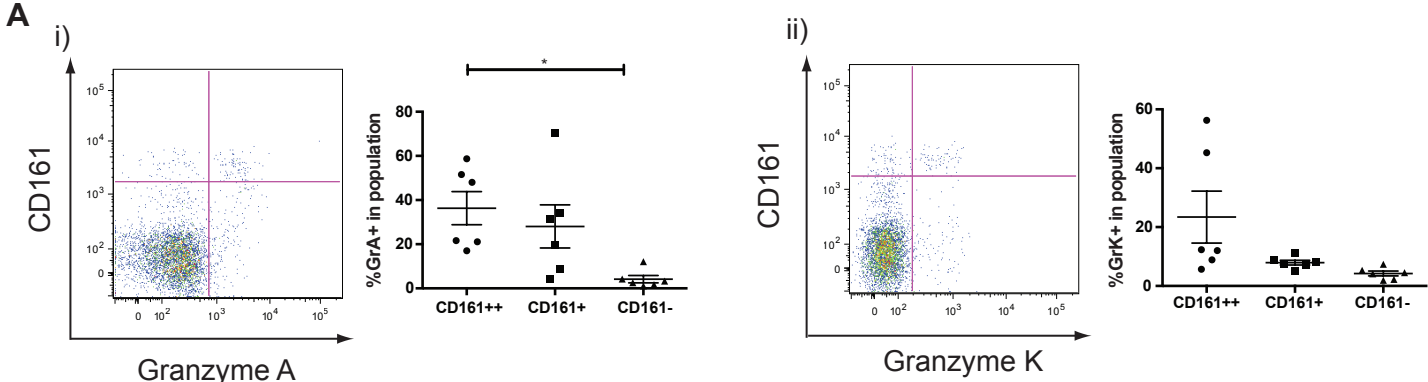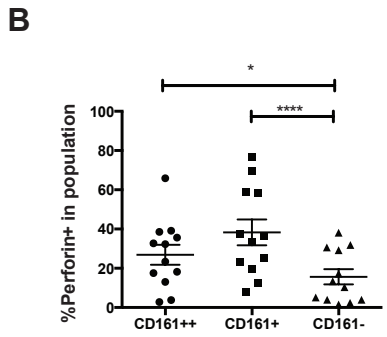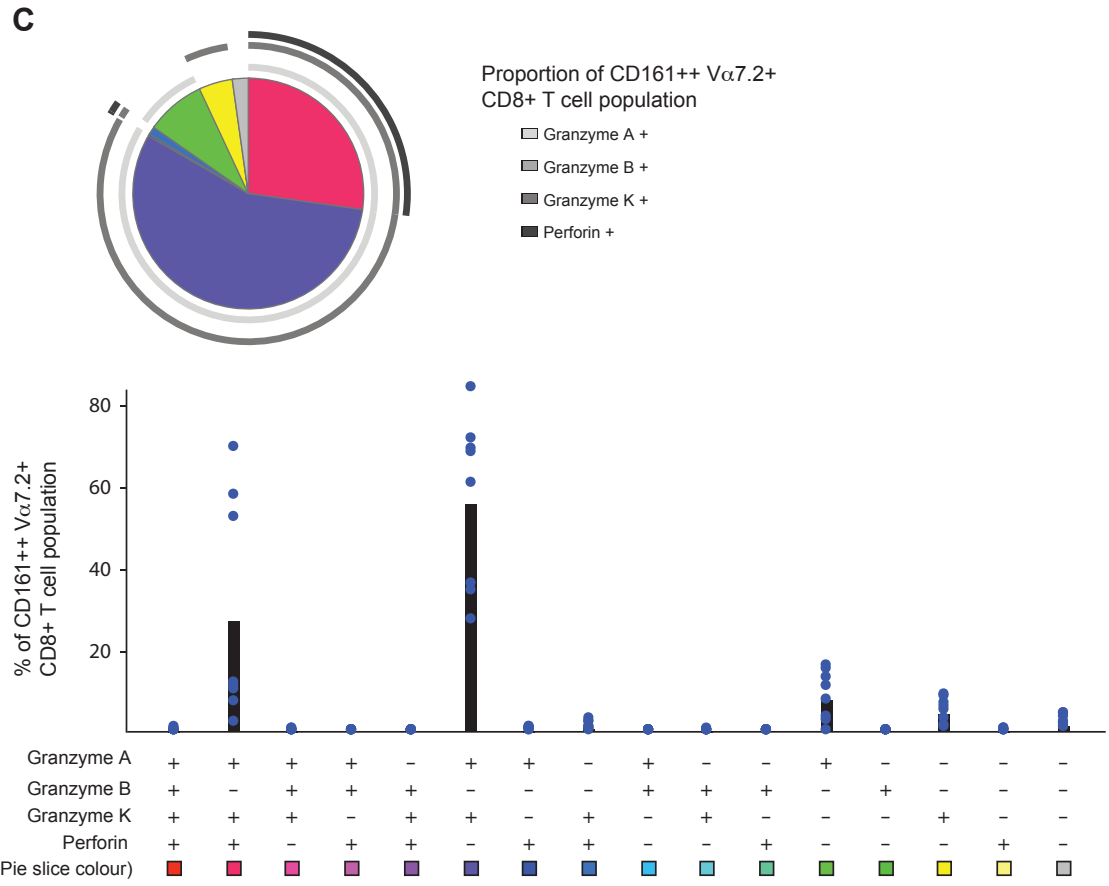

**Figure S2**

**A**

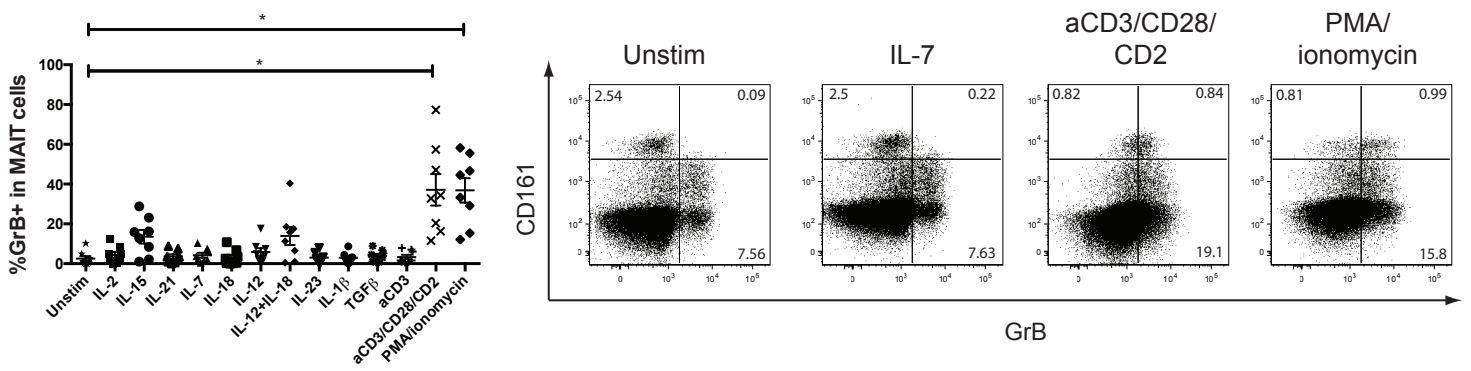

**B**

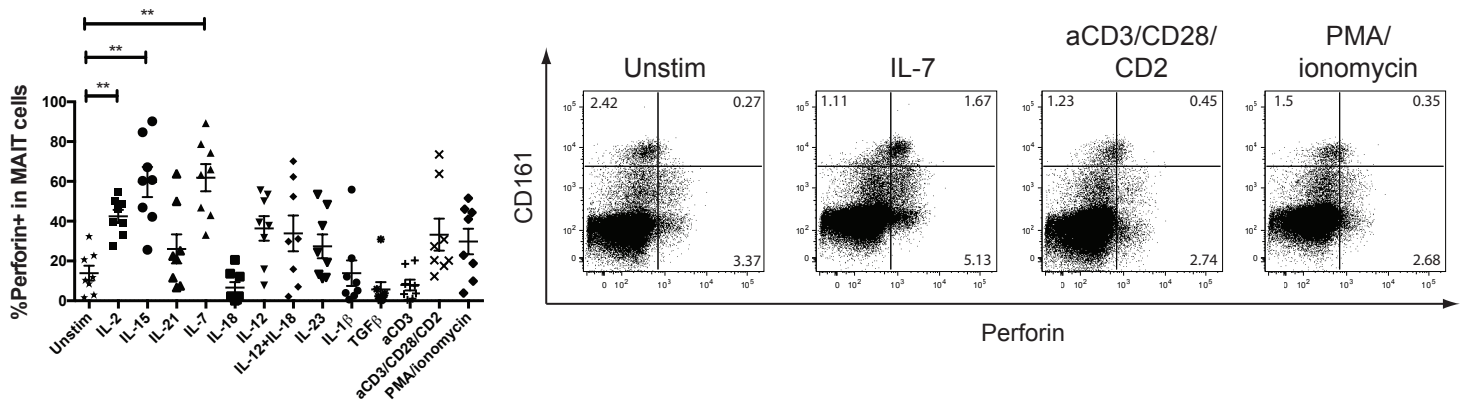

**C**

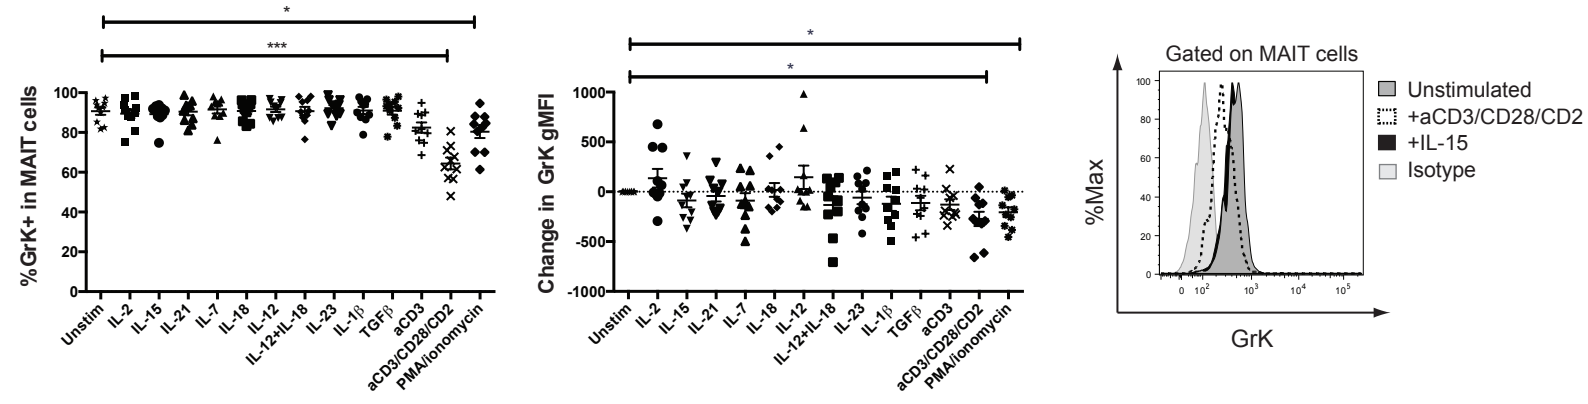

**D**

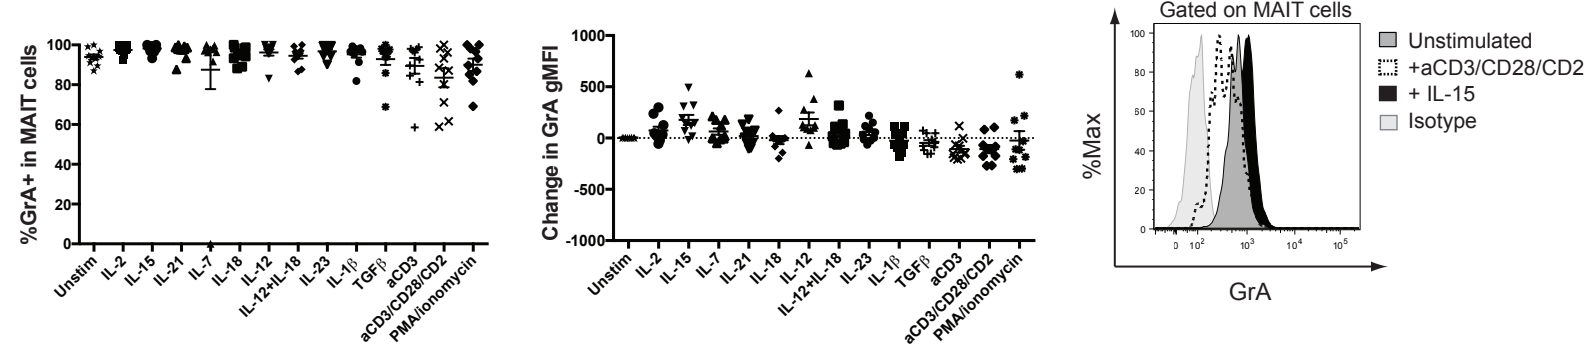

**E**

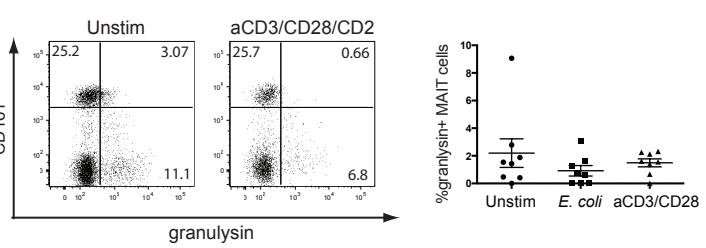

**F**

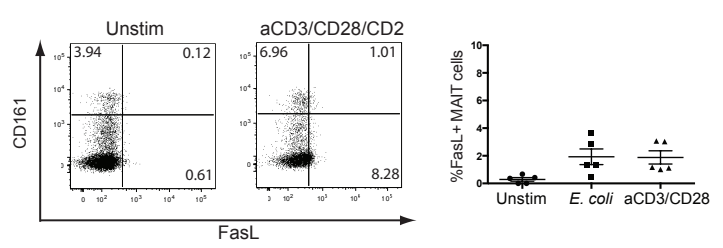



**Figure S3**

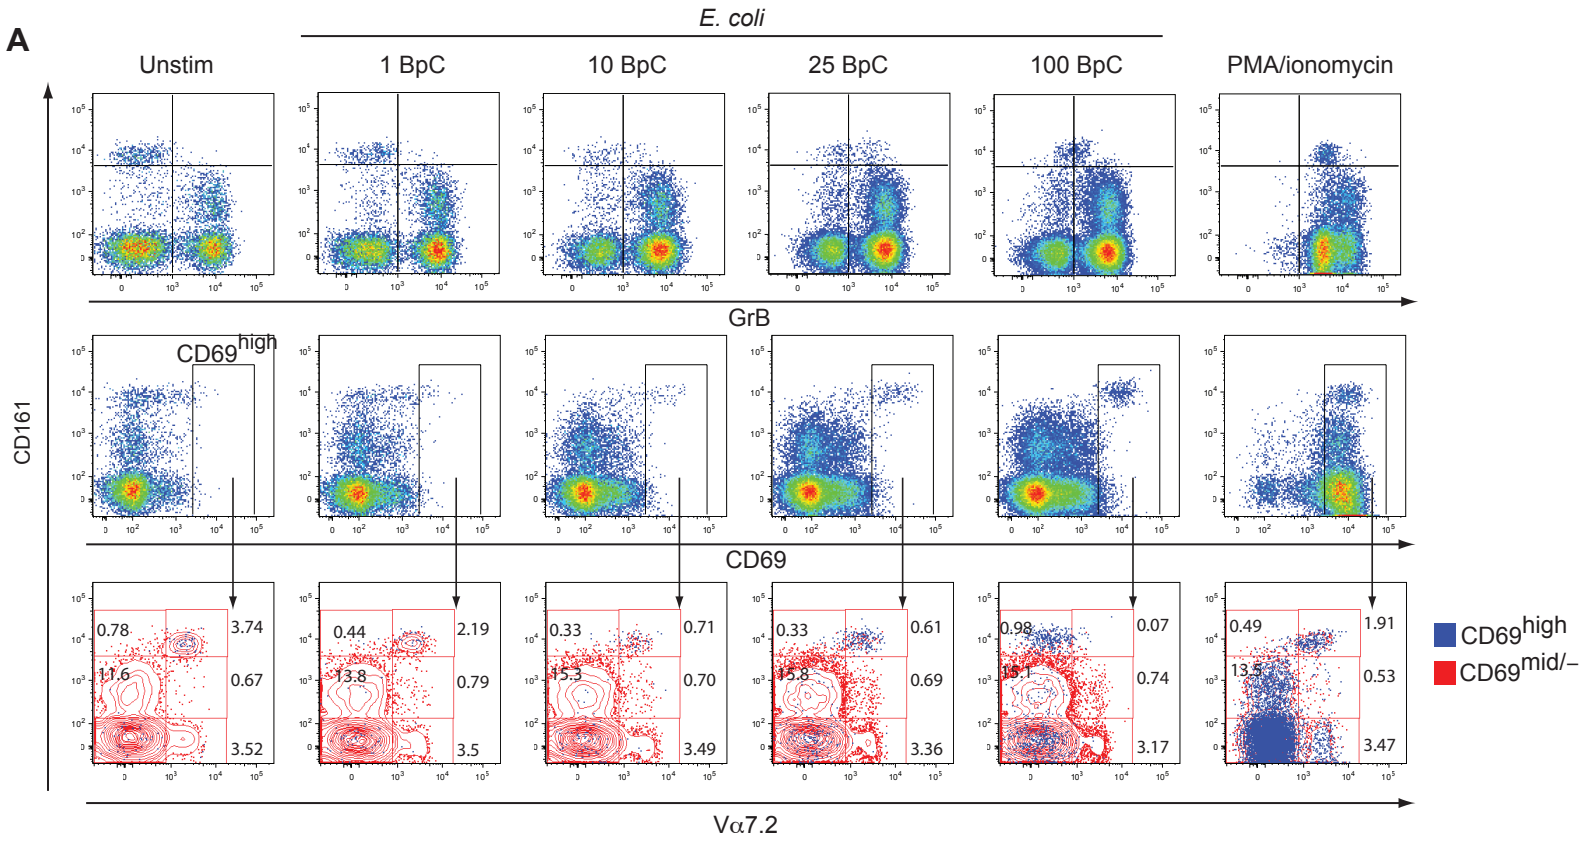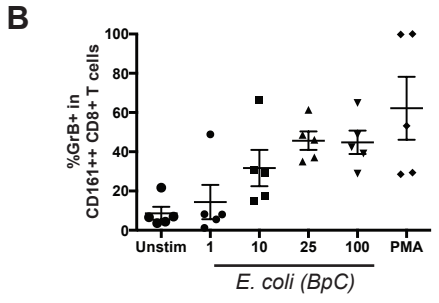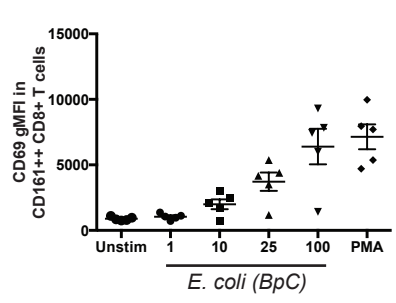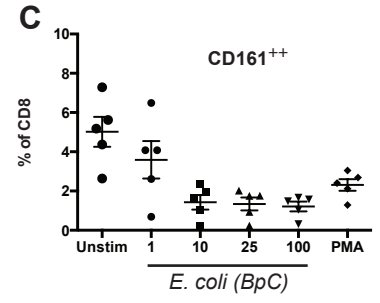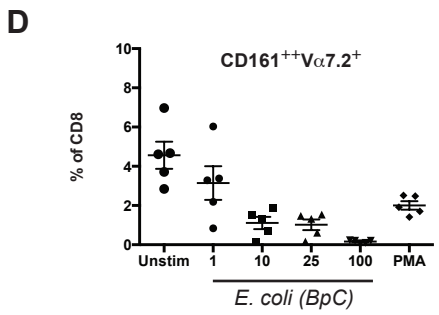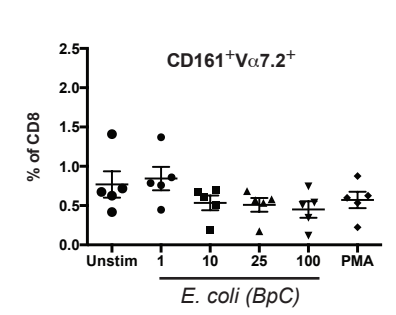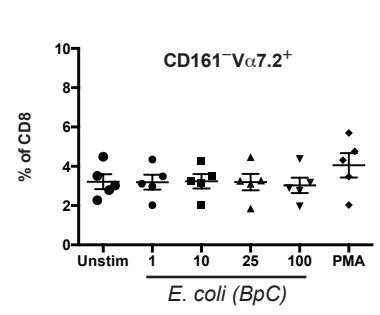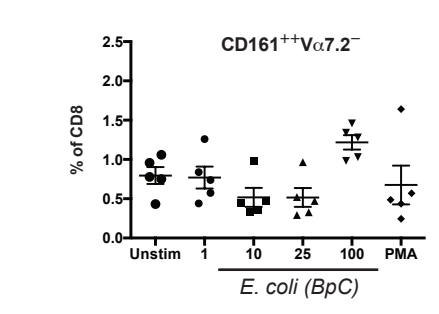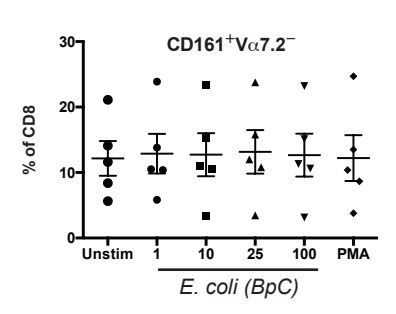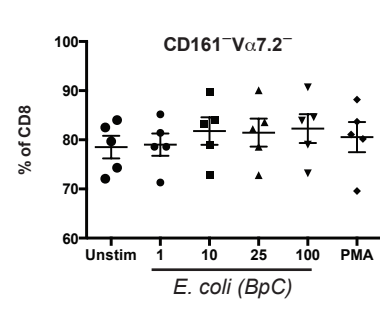

**Figure S4**

**A**

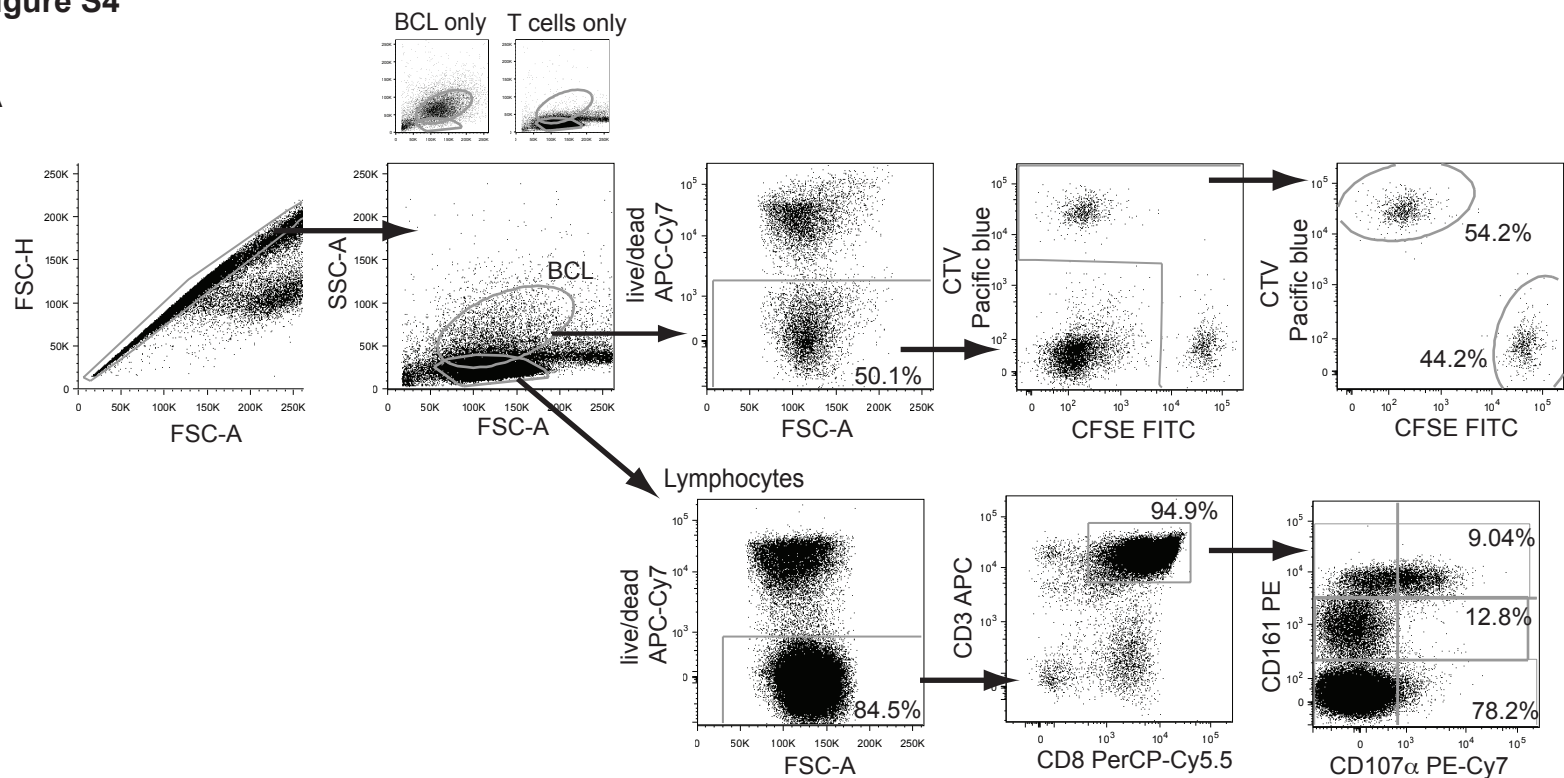

**B**

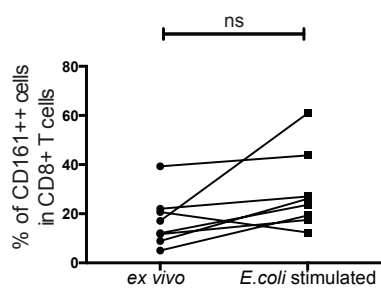

**C**

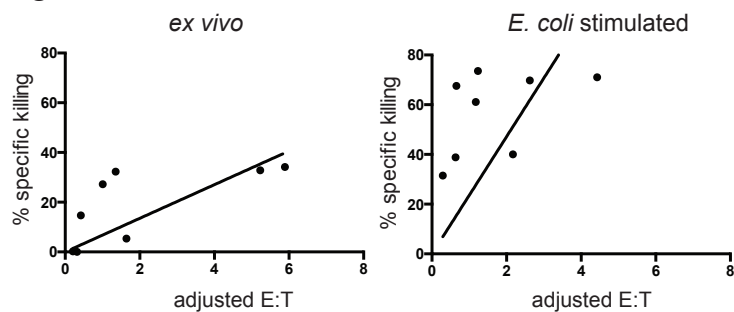

**D**

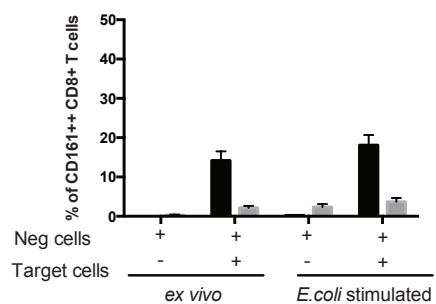

**Figure S5**

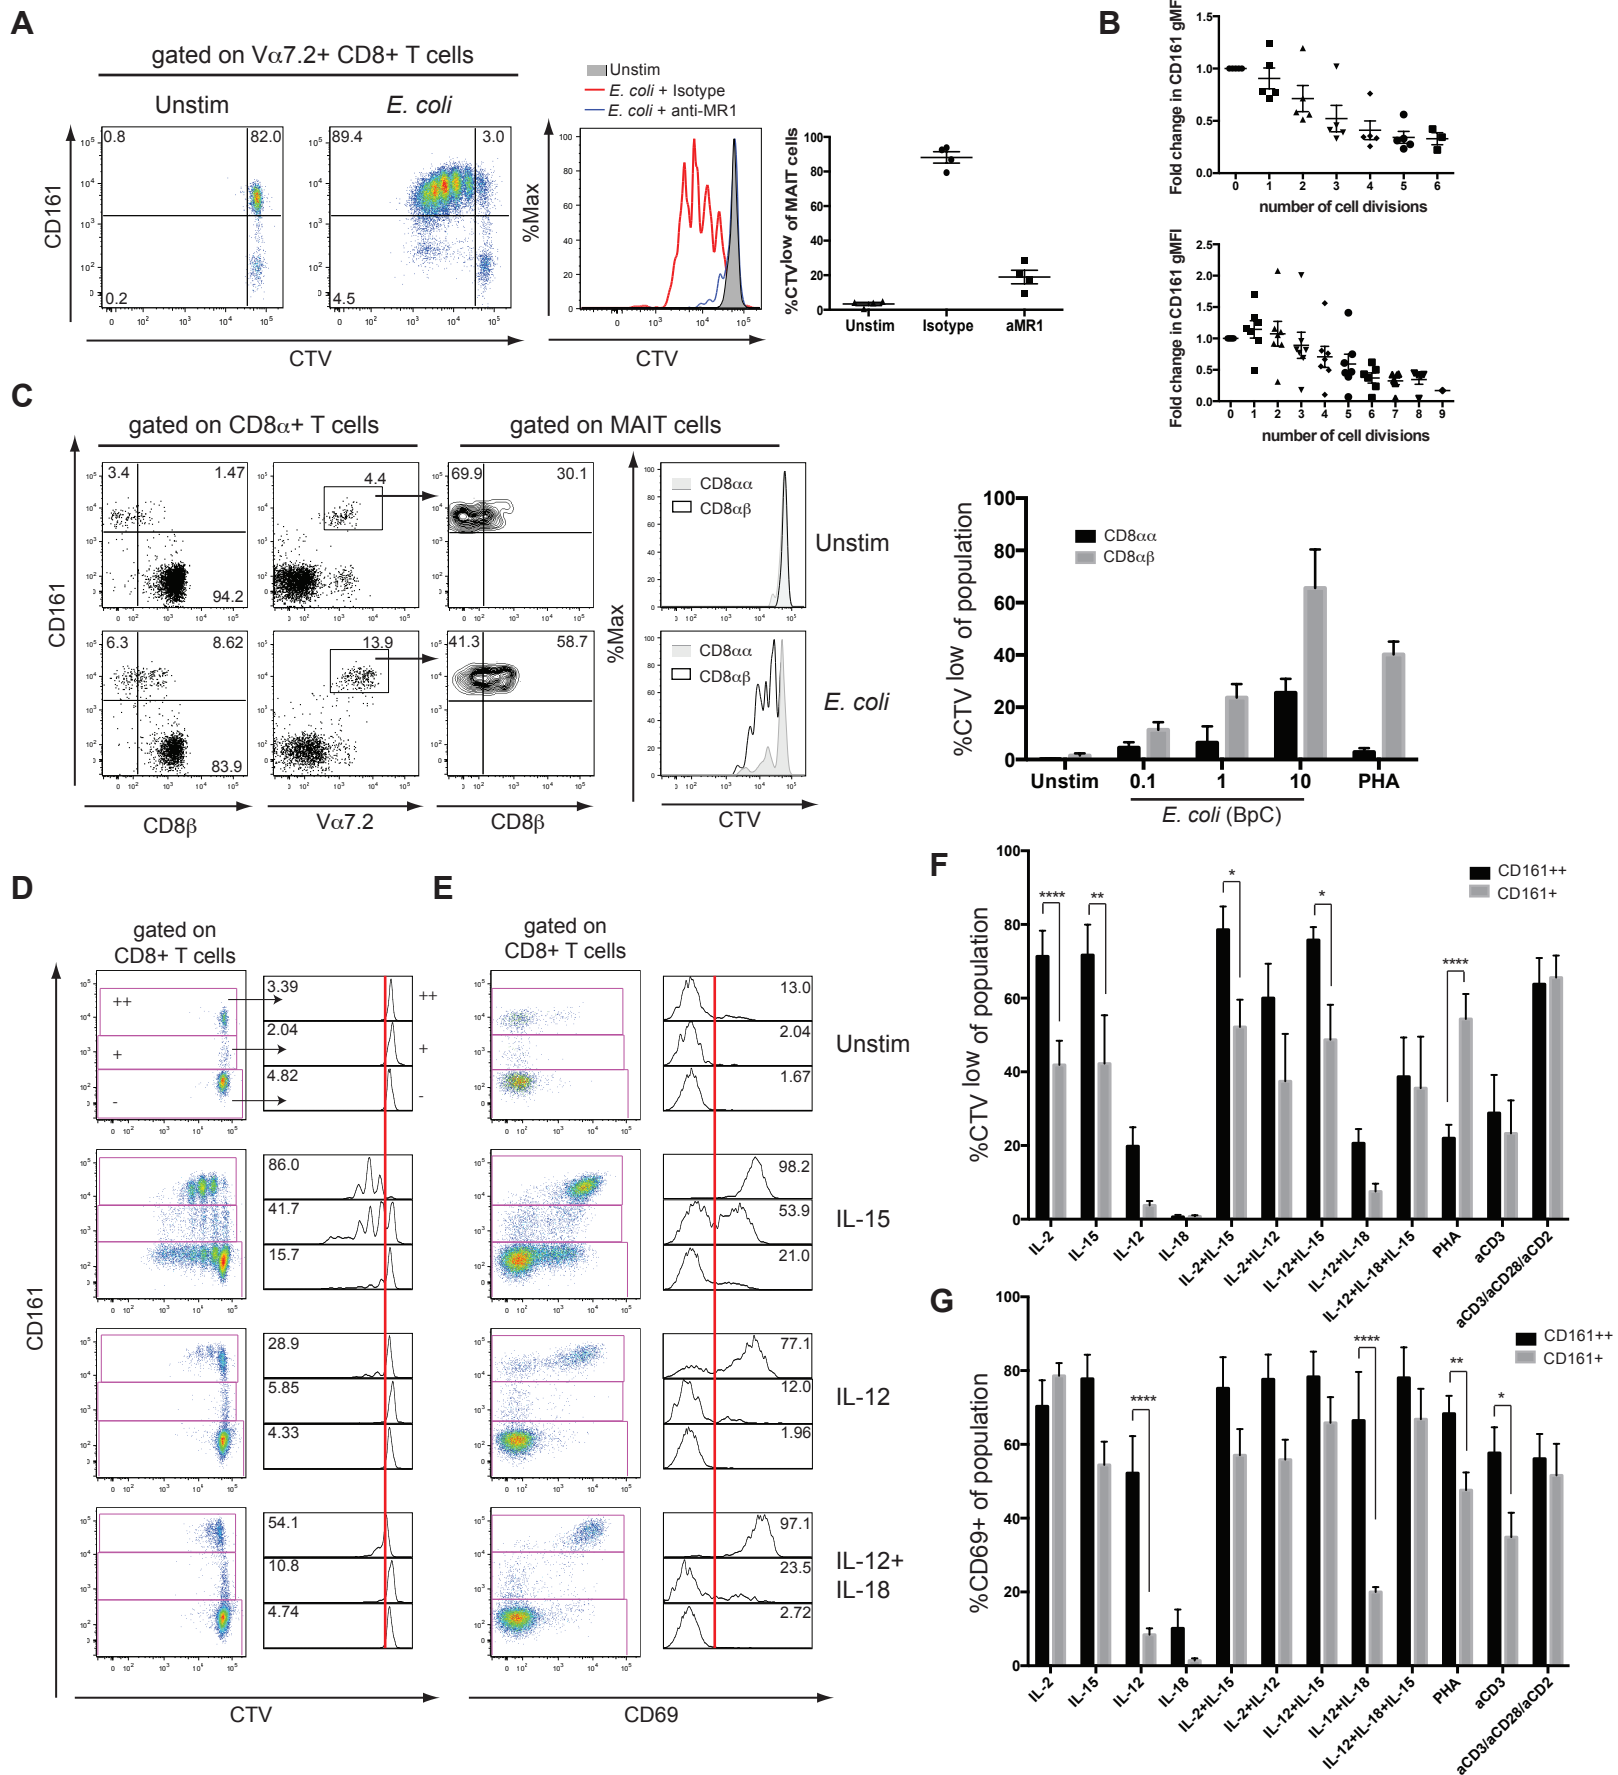

**Figure S6**

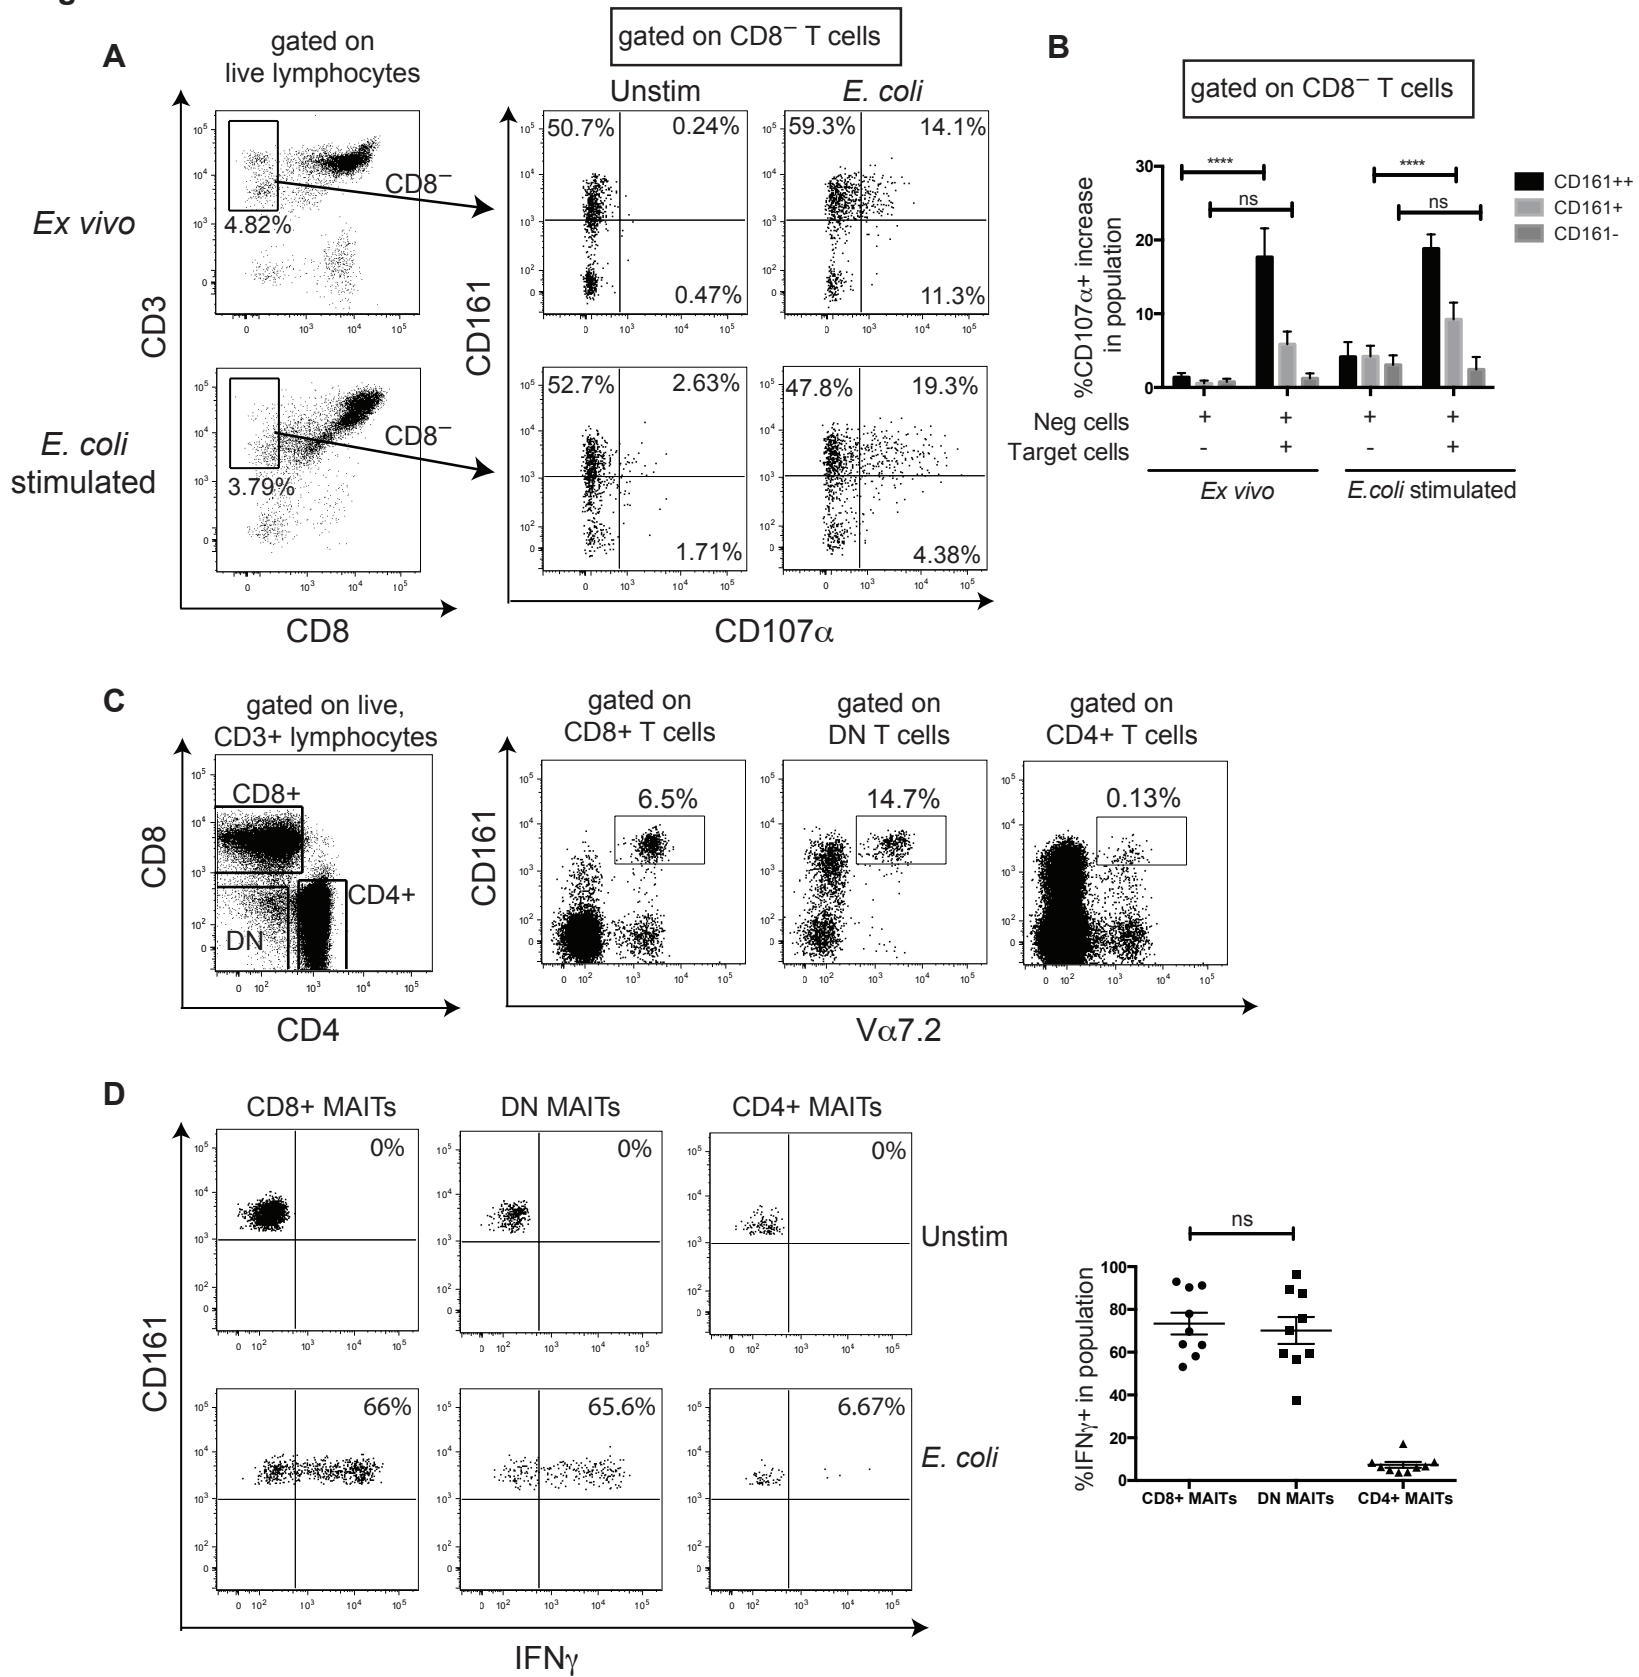

Supplement: mi201481x1.pdf [file mi201481x1.pdf]
